# Supplementary material for: An Analysis of the Filaggrin Gene Polymorphism in Korean Atopic Dermatitis Patients
Source: PubMed Central journal article supplement — J Korean Med Sci. 2016 May 9;31(7):1136–42. doi: 10.3346/jkms.2016.31.7.1136 (PMC4901008; doi:10.3346/jkms.2016.31.7.1136), 2016-05-09
Supplement: jkms-31-1136-s001.pdf [file jkms-31-1136-s001.pdf]

**Supplementary Table 1.** Genetic polymorphism of *FLG* in Korean atopic dermatitis patients

| Location | Change HGCO | Code    | AA HUGO    | SNP (NCBI) | SNP* (A/B/C) | Genotype frequency |              |              |              | Allele frequency |              |              |
|----------|-------------|---------|------------|------------|--------------|--------------------|--------------|--------------|--------------|------------------|--------------|--------------|
|          |             |         |            |            |              | AA                 | Aa           | aa           | P            | A                | a            | P            |
| Repeat 0 | c.975G>A    | GCG>GCA | p.=(325A)  | New        | None         | 0.89<br>1.00       | 0.11<br>0.00 | 0.00<br>0.00 | <b>0.028</b> | 0.94<br>1.00     | 0.06<br>0.00 | <b>0.030</b> |
| Repeat 0 | c.995G>T    | GGC>GTC | p.G332V    | rs41267154 | G/T/T        | 0.06<br>0.24       | 0.45<br>0.46 | 0.49<br>0.40 | <b>0.025</b> | 0.28<br>0.42     | 0.71<br>0.58 | <b>0.043</b> |
| Repeat 0 | c.1236T>C   | CGT>CGC | p.=(412R)  | rs11582620 | None         | 0.82<br>0.84       | 0.18<br>0.16 | 0.00<br>0.00 | 0.801        | 0.91<br>0.92     | 0.09<br>0.08 | 0.810        |
| Repeat 0 | c.1330G>A   | GGG>AGG | p.G444R    | rs11588170 | G/A/G        | 0.11<br>0.24       | 0.51<br>0.42 | 0.38<br>0.34 | 0.203        | 0.36<br>0.45     | 0.64<br>0.55 | 0.209        |
| Repeat 0 | c.1360A>G   | ACA>GCA | p.T454A    | rs2011331  | A/G/G        | 0.06<br>0.24       | 0.45<br>0.46 | 0.49<br>0.40 | <b>0.025</b> | 0.28<br>0.42     | 0.71<br>0.58 | <b>0.043</b> |
| Repeat 1 | c.1432C>T   | CCT>TCT | p.P478S    | rs11584340 | C/T/T        | 0.06<br>0.24       | 0.45<br>0.46 | 0.49<br>0.40 | <b>0.025</b> | 0.28<br>0.42     | 0.71<br>0.58 | <b>0.043</b> |
| Repeat 1 | c.1555C>A   | CAC>AAC | p.H519N    | rs12036682 | None         | 0.81<br>0.68       | 0.18<br>0.26 | 0.0<br>0.06  | 0.096        | 0.91<br>0.81     | 0.09<br>0.19 | <b>0.046</b> |
| Repeat 1 | c.2181C>A   | CAC>CAA | p.H727Q    | rs35904544 | C/C/A        | 0.84<br>0.90       | 0.05<br>0.04 | 0.11<br>0.06 | 0.614        | 0.86<br>0.92     | 0.14<br>0.08 | 0.269        |
| Repeat 1 | c.2263G>A   | GAA>AAA | p.E755K    | rs74129461 | G/A/A        | 0.06<br>0.22       | 0.45<br>0.36 | 0.49<br>0.42 | <b>0.044</b> | 0.28<br>0.40     | 0.72<br>0.60 | 0.081        |
| Repeat 2 | c.2508T>C   | GAT>GAC | p.=(836D)  | rs3120653  | T/C/C        | 0.46<br>0.04       | 0.49<br>0.04 | 0.49<br>0.42 | 0.673        | 0.48<br>0.56     | 0.52<br>0.44 | 0.272        |
| Repeat 2 | c.2938C>G   | CAT>GAT | p.H980D    | rs12756586 | C/C/G        | 0.84<br>0.88       | 0.05<br>0.04 | 0.11<br>0.08 | 0.816        | 0.86<br>0.90     | 0.14<br>0.10 | 0.523        |
| Repeat 2 | c.3154A>G   | AGA>GGA | p.R1052G   | New        | None         | 0.98<br>0.96       | 0.02<br>0.04 | 0.00<br>0.00 | 0.604        | 0.99<br>0.98     | 0.01<br>0.02 | 0.606        |
| Repeat 3 | c.3387T>C   | TCT>TCC | p.=(1129S) | rs9436067  | T/C/C        | 0.46<br>0.54       | 0.06<br>0.04 | 0.49<br>0.42 | 0.673        | 0.48<br>0.56     | 0.52<br>0.44 | 0.272        |
| Repeat 3 | c.3397C>T   | CGG>TGG | p.R1133W   | New        | None         | 0.98<br>0.96       | 0.02<br>0.04 | 0.00<br>0.00 | 0.604        | 0.99<br>0.98     | 0.01<br>0.02 | 0.606        |
| Repeat 3 | c.3500C>G   | GCA>GGA | p.A1167G   | rs7530018  | C/G/G        | 0.46<br>0.54       | 0.06<br>0.04 | 0.49<br>0.42 | 0.673        | 0.48<br>0.56     | 0.52<br>0.44 | 0.272        |
| Repeat 3 | c.3574G>A   | GGG>AGG | p.G1192R   | New        | None         | 0.96<br>0.96       | 0.04<br>0.04 | 0.00<br>0.00 | 1.000        | 0.98<br>0.98     | 0.02<br>0.02 | 1.000        |
| Repeat 3 | c.4079G>A   | CGC>CAC | p.R1360H   | rs11586631 | G/A/G        | 0.11<br>0.24       | 0.51<br>0.42 | 0.38<br>0.34 | 0.203        | 0.36<br>0.45     | 0.64<br>0.55 | 0.209        |
| Repeat 3 | c.4126A>G   | AGA>GGA | p.R1376G   | rs11581433 | A/G/G        | 0.06<br>0.24       | 0.45<br>0.36 | 0.49<br>0.40 | <b>0.025</b> | 0.28<br>0.42     | 0.72<br>0.58 | <b>0.043</b> |
| Repeat 4 | c.4410T>C   | CAT>CAC | p.=(1470H) | rs12732920 | T/T/C        | 0.84<br>0.88       | 0.16<br>0.12 | 0.00<br>0.00 | 0.586        | 0.92<br>0.94     | 0.08<br>0.06 | 0.600        |
| Repeat 4 | c.4445C>A   | TCC>TAC | p.S1482Y   | rs11204978 | C/A/C        | 0.11<br>0.24       | 0.51<br>0.42 | 0.38<br>0.34 | 0.203        | 0.36<br>0.45     | 0.64<br>0.55 | 0.209        |
| Repeat 4 | c.4452C>G   | GAC>GAG | p.D1484E   | rs71626706 | C/C/G        | 0.84<br>0.88       | 0.16<br>0.12 | 0.00<br>0.00 | 0.586        | 0.92<br>0.94     | 0.08<br>0.06 | 0.600        |
| Repeat 4 | c.4568C>T   | ACA>ATA | p.T1523I   | rs12750081 | C/C/T        | 0.84<br>0.88       | 0.16<br>0.12 | 0.00<br>0.00 | 0.586        | 0.92<br>0.94     | 0.08<br>0.06 | 0.600        |
| Repeat 4 | c.4867C>T   | CGG>TGG | p.R1623W   | New        | None         | 1.00<br>0.94       | 0.00<br>0.06 | 0.00<br>0.00 | 0.105        | 1.00<br>0.97     | 0.00<br>0.03 | 0.106        |
| Repeat 4 | c.5051G>A   | CGC>CAC | p.R1684H   | rs12407807 | G/A/G        | 0.11<br>0.24       | 0.51<br>0.42 | 0.38<br>0.34 | 0.203        | 0.36<br>0.45     | 0.64<br>0.55 | 0.209        |
| Repeat 4 | c.5095C>T   | CGC>TGC | p.R1699C   | rs12405278 | C/T/C        | 0.11<br>0.24       | 0.51<br>0.42 | 0.38<br>0.34 | 0.203        | 0.36<br>0.45     | 0.64<br>0.55 | 0.209        |
| Repeat 5 | c.5414C>T   | GCG>GTG | p.A1805V   | rs12405241 | C/T/C        | 0.11<br>0.24       | 0.51<br>0.42 | 0.38<br>0.34 | 0.203        | 0.36<br>0.45     | 0.64<br>0.55 | 0.209        |
| Repeat 5 | c.5617C>A   | CAA>AAA | p.Q1873K   | rs62623409 | C/C/A        | 0.84<br>0.88       | 0.16<br>0.12 | 0.00<br>0.00 | 0.586        | 0.92<br>0.94     | 0.08<br>0.06 | 0.600        |
| Repeat 5 | c.5671C>T   | CGG>TGG | p.R1891W   | rs36006086 | C/C/T        | 0.84<br>0.88       | 0.16<br>0.12 | 0.00<br>0.00 | 0.586        | 0.92<br>0.94     | 0.08<br>0.06 | 0.600        |
| Repeat 5 | c.5672G>A   | CGG>CAG | p.R1891Q   | rs12407748 | G/A/G        | 0.11<br>0.24       | 0.51<br>0.42 | 0.38<br>0.34 | 0.203        | 0.36<br>0.45     | 0.64<br>0.55 | 0.209        |
| Repeat 5 | c.5883C>A   | CAC>CAA | p.H1961Q   | rs3126079  | C/A/A        | 0.05<br>0.24       | 0.46<br>0.36 | 0.49<br>0.40 | <b>0.025</b> | 0.28<br>0.42     | 0.72<br>0.58 | <b>0.043</b> |

(Continued to the next page)

Supplementary Table 1. Continued

| Location   | Change HGCO | Code    | AA HUGO    | SNP (NCBI) | SNP* (A/B/C) | Genotype frequency |      |      |       | Allele frequency |      |       |
|------------|-------------|---------|------------|------------|--------------|--------------------|------|------|-------|------------------|------|-------|
|            |             |         |            |            |              | AA                 | Aa   | aa   | P     | A                | a    | P     |
| Repeat 5   | c.6045C>A   | GAC>GAA | p.D2015E   | rs71626704 | C/C/A        | 0.84               | 0.16 | 0.00 | 0.586 | 0.92             | 0.08 | 0.600 |
|            |             |         |            |            |              | 0.88               | 0.12 | 0.00 |       | 0.94             | 0.06 |       |
| Repeat 6   | c.6498T>C   | TCT>TCC | p.=(2166S) | rs2184954  | T/C/C        | 0.05               | 0.46 | 0.49 | 0.025 | 0.28             | 0.72 | 0.043 |
|            |             |         |            |            |              | 0.24               | 0.36 | 0.40 |       | 0.42             | 0.58 |       |
| Repeat 6   | c.6574A>C   | AAA>CAA | p.K2192Q   | New        | A/A/C        | 0.84               | 0.16 | 0.00 | 0.586 | 0.92             | 0.08 | 0.600 |
|            |             |         |            |            |              | 0.88               | 0.12 | 0.00 |       | 0.94             | 0.06 |       |
| Repeat 6   | c.6580T>C   | TAT>CAT | p.Y2194H   | rs2184953  | T/C/C        | 0.05               | 0.46 | 0.49 | 0.025 | 0.28             | 0.72 | 0.043 |
|            |             |         |            |            |              | 0.24               | 0.36 | 0.40 |       | 0.42             | 0.58 |       |
| Repeat 6   | c.6990C>T   | CAC>CAT | p.=(2330H) | rs71626703 | C/T/T        | 0.05               | 0.46 | 0.49 | 0.025 | 0.28             | 0.72 | 0.043 |
|            |             |         |            |            |              | 0.24               | 0.36 | 0.40 |       | 0.42             | 0.58 |       |
| Repeat 6   | c.7015G>A   | GAC>AAC | p.D2339N   | New        | G/A/A        | 0.05               | 0.46 | 0.49 | 0.025 | 0.28             | 0.72 | 0.043 |
|            |             |         |            |            |              | 0.24               | 0.36 | 0.40 |       | 0.42             | 0.58 |       |
| Repeat 6   | c.7097G>C   | AGT>ACT | p.S2366T   | rs71625202 | G/C/C        | 0.05               | 0.46 | 0.49 | 0.025 | 0.28             | 0.72 | 0.043 |
|            |             |         |            |            |              | 0.24               | 0.36 | 0.40 |       | 0.42             | 0.58 |       |
| Repeat 6   | c.7171C>T   | CCC>TCC | p.P2391S   | New        | C/C/C (Bs=T) | 0.96               | 0.04 | 0.00 | 0.496 | 0.98             | 0.18 | 0.499 |
|            |             |         |            |            |              | 1.00               | 0.00 | 0.00 |       | 1.00             | 0.00 |       |
| Repeat 6   | c.7192G>C   | GAG>CAG | p.E2398Q   | rs71625201 | G/C/C (Bs=G) | 0.07               | 0.46 | 0.47 | 0.058 | 0.30             | 0.70 | 0.084 |
|            |             |         |            |            |              | 0.24               | 0.36 | 0.40 |       | 0.42             | 0.58 |       |
| Repeat 6   | c.7198A>G   | ACA>GCA | p.T2400A   | New        | A/A/A (Bs=G) | 0.96               | 0.04 | 0.00 | 0.496 | 0.98             | 0.18 | 0.499 |
|            |             |         |            |            |              | 1.00               | 0.00 | 0.00 |       | 1.00             | 0.00 |       |
| Repeat 6   | c.7214C>G   | GCA>GGA | p.A2405G   | New        | C/C/C (Bs=G) | 0.96               | 0.04 | 0.00 | 0.496 | 0.98             | 0.18 | 0.499 |
|            |             |         |            |            |              | 1.00               | 0.00 | 0.00 |       | 1.00             | 0.00 |       |
| Repeat 6   | c.7215A>G   | GCA>GCG | p.=(2405A) | New        | A/A/A (Bs=G) | 0.96               | 0.04 | 0.00 | 0.496 | 0.98             | 0.18 | 0.499 |
|            |             |         |            |            |              | 1.00               | 0.00 | 0.00 |       | 1.00             | 0.00 |       |
| Repeat 6   | c.7217G>A   | GGA>GAA | p.G2406E   | New        | G/G/G (Bs=A) | 0.96               | 0.04 | 0.00 | 0.496 | 0.98             | 0.18 | 0.499 |
|            |             |         |            |            |              | 1.00               | 0.00 | 0.00 |       | 1.00             | 0.00 |       |
| Repeat 7   | c.7220G>C   | AGG>ACG | p.R2407T   | New        | G/G/G (Bs=C) | 0.96               | 0.04 | 0.00 | 0.496 | 0.98             | 0.18 | 0.499 |
|            |             |         |            |            |              | 1.00               | 0.00 | 0.00 |       | 1.00             | 0.00 |       |
| Repeat 7   | c.7229G>A   | CGT>CAT | p.R2410H   | New        | G/G/G (Bs=A) | 0.96               | 0.04 | 0.00 | 0.496 | 0.98             | 0.18 | 0.499 |
|            |             |         |            |            |              | 1.00               | 0.00 | 0.00 |       | 1.00             | 0.00 |       |
| Repeat 7   | c.7236G>A   | GGG>GGA | p.=(2412G) | New        | G/G/G (Bs=A) | 0.96               | 0.04 | 0.00 | 0.496 | 0.98             | 0.18 | 0.499 |
|            |             |         |            |            |              | 1.00               | 0.00 | 0.00 |       | 1.00             | 0.00 |       |
| Repeat 7   | c.7330A>G   | AAG>GAG | p.K2444E   | rs71625200 | A/G/G        | 0.05               | 0.46 | 0.49 | 0.025 | 0.28             | 0.72 | 0.043 |
|            |             |         |            |            |              | 0.24               | 0.36 | 0.40 |       | 0.42             | 0.58 |       |
| Repeat 7   | c.7398G>A   | CCG>CCA | p.=(2466P) | rs71625199 | G/G/A        | 0.84               | 0.16 | 0.00 | 0.586 | 0.92             | 0.08 | 0.600 |
|            |             |         |            |            |              | 0.88               | 0.12 | 0.00 |       | 0.94             | 0.06 |       |
| Repeat 7   | c.7442T>C   | TTG>TCG | p.L2481S   | rs55650366 | T/C/C        | 0.05               | 0.46 | 0.49 | 0.025 | 0.28             | 0.72 | 0.043 |
|            |             |         |            |            |              | 0.24               | 0.36 | 0.40 |       | 0.42             | 0.58 |       |
| Repeat 7   | c.7521C>G   | CAC>CAG | p.H2507Q   | rs3126074  | C/G/G        | 0.05               | 0.46 | 0.49 | 0.025 | 0.28             | 0.72 | 0.043 |
|            |             |         |            |            |              | 0.24               | 0.36 | 0.40 |       | 0.42             | 0.58 |       |
| Repeat 7   | c.7633G>A   | GGA>AGA | p.G2545R   | rs3126072  | G/A/A        | 0.05               | 0.46 | 0.49 | 0.025 | 0.28             | 0.72 | 0.043 |
|            |             |         |            |            |              | 0.24               | 0.36 | 0.40 |       | 0.42             | 0.58 |       |
| Repeat 7   | c.7956A>C   | GAA>GAC | p.E2652D   | New        | C/A/A (A'=A) | 0.73               | 0.27 | 0.00 | 0.030 | 0.87             | 0.14 | 0.024 |
|            |             |         |            |            |              | 0.56               | 0.34 | 0.10 |       | 0.73             | 0.27 |       |
| Repeat 8   | c.8506A>C   | AGT>CGT | p.S2836R   | rs11582087 | A/C/A        | 0.11               | 0.51 | 0.38 | 0.203 | 0.36             | 0.64 | 0.209 |
|            |             |         |            |            |              | 0.24               | 0.42 | 0.42 |       | 0.45             | 0.55 |       |
| Repeat 8   | c.8673G>T   | GTG>GTT | p.=(2891V) | New        | G/T/T        | 0.05               | 0.46 | 0.49 | 0.025 | 0.28             | 0.72 | 0.043 |
|            |             |         |            |            |              | 0.24               | 0.36 | 0.40 |       | 0.42             | 0.58 |       |
| Repeat 8   | c.8807A>G   | GAC>GGC | p.D2936G   | New        | A/G/G        | 0.05               | 0.46 | 0.49 | 0.025 | 0.28             | 0.72 | 0.043 |
|            |             |         |            |            |              | 0.24               | 0.36 | 0.40 |       | 0.42             | 0.58 |       |
| Repeat 8.2 | 8B153T>C    | GAT>GAC | p.=(D)     | New        | x/T/C (A'=C) | 0.11               | 0.51 | 0.38 | 0.778 | 0.36             | 0.64 | 0.473 |
|            |             |         |            |            |              | 0.16               | 0.47 | 0.38 |       | 0.42             | 0.58 |       |
| Repeat 9   | c.9313T>G   | TAC>GAC | p.Y3105D   | rs2065958  | T/G/G        | 0.05               | 0.42 | 0.53 | 0.024 | 0.26             | 0.74 | 0.020 |
|            |             |         |            |            |              | 0.24               | 0.36 | 0.40 |       | 0.42             | 0.58 |       |
| Repeat 9   | c.9536T>G   | GTG>GGG | p.V3179G   | rs2065957  | T/G/G        | 0.05               | 0.46 | 0.49 | 0.025 | 0.28             | 0.72 | 0.043 |
|            |             |         |            |            |              | 0.24               | 0.36 | 0.40 |       | 0.42             | 0.58 |       |
| Repeat 9   | c.9540A>G   | TCA>TCG | p.=(3180S) | rs3126069  | A/G/G        | 0.05               | 0.46 | 0.49 | 0.025 | 0.28             | 0.72 | 0.043 |
|            |             |         |            |            |              | 0.24               | 0.36 | 0.40 |       | 0.42             | 0.58 |       |
| Repeat 9   | c.9645G>T   | GTG>GTT | p.=(3215V) | rs9436066  | G/T/T        | 0.05               | 0.40 | 0.55 | 0.023 | 0.26             | 0.75 | 0.013 |
|            |             |         |            |            |              | 0.24               | 0.36 | 0.40 |       | 0.42             | 0.58 |       |

(Continued to the next page)

Supplementary Table 1. Continued

| Location  | Change HGCO | Code     | AA HUGO    | SNP (NCBI) | SNP* (A/B/C) | Genotype frequency |              |              |              | Allele frequency |              |              |
|-----------|-------------|----------|------------|------------|--------------|--------------------|--------------|--------------|--------------|------------------|--------------|--------------|
|           |             |          |            |            |              | AA                 | Aa           | aa           | P            | A                | a            | P            |
| Repeat 9  | c.9658G>C   | GAC>CAC  | p.D3220H   | New        | None         | 0.96<br>0.94       | 0.04<br>0.08 | 0.00<br>0.00 | 0.421        | 0.98<br>0.96     | 0.02<br>0.04 | 0.427        |
| Repeat 9  | c.9792C>T   | CAC>CAT  | p.=(3264H) | New        | C/C/T        | 0.84<br>0.88       | 0.16<br>0.12 | 0.00<br>0.00 | 0.586        | 0.92<br>0.94     | 0.08<br>0.06 | 0.600        |
| Repeat 9  | c.9808C>T   | CGC>TGC  | p.R3270C   | New        | C/C/T        | 0.84<br>0.88       | 0.16<br>0.12 | 0.00<br>0.00 | 0.586        | 0.92<br>0.94     | 0.08<br>0.06 | 0.600        |
| Repeat 9  | c.9838G>C   | GAG>CAG  | p.E3280Q   | New        | None         | 0.98<br>0.96       | 0.02<br>0.04 | 0.00<br>0.00 | 0.604        | 0.99<br>0.98     | 0.01<br>0.02 | 0.606        |
| Repeat 9  | c.9966A>G   | CAA>CAG  | p.=(3322Q) | rs6681433  | A/G/G        | 0.05<br>0.24       | 0.46<br>0.36 | 0.49<br>0.40 | <b>0.025</b> | 0.28<br>0.42     | 0.72<br>0.58 | <b>0.043</b> |
| Repeat 9  | c.10017G>A  | CAG>CAA  | p.=(3339Q) | rs2065956  | G/A/G        | 0.11<br>0.24       | 0.51<br>0.42 | 0.38<br>0.34 | 0.203        | 0.36<br>0.45     | 0.64<br>0.55 | 0.209        |
| Repeat 10 | c.10194T>C  | TCT>TCC  | p.=(3732S) | rs3091276  | T/C/C        | 0.05<br>0.24       | 0.46<br>0.36 | 0.49<br>0.40 | <b>0.025</b> | 0.28<br>0.42     | 0.72<br>0.58 | <b>0.043</b> |
| Repeat 10 | c.10203G>A  | GGG>GGA  | p.=(3401G) | New        | G/G/A        | 0.84<br>0.88       | 0.16<br>0.12 | 0.00<br>0.00 | 0.586        | 0.92<br>0.94     | 0.08<br>0.06 | 0.600        |
| Repeat 10 | c.10206G>C  | CGG>CGC  | p.=(3402R) | New        | G/G/C        | 0.84<br>0.88       | 0.16<br>0.12 | 0.00<br>0.00 | 0.586        | 0.92<br>0.94     | 0.08<br>0.06 | 0.600        |
| Repeat 10 | c.10209C>A  | ACC>ACA  | p.=(3403T) | New        | C/C/A        | 0.84<br>0.88       | 0.16<br>0.12 | 0.00<br>0.00 | 0.586        | 0.92<br>0.94     | 0.08<br>0.06 | 0.600        |
| Repeat 10 | c.10210A>G  | AGG>GGG  | p.R3404G   | New        | A/A/G        | 0.84<br>0.88       | 0.16<br>0.12 | 0.00<br>0.00 | 0.586        | 0.92<br>0.94     | 0.08<br>0.06 | 0.600        |
| Repeat 10 | c.10213A>C  | ACC>CCC  | p.T3405P   | New        | A/A/C        | 0.84<br>0.88       | 0.16<br>0.12 | 0.00<br>0.00 | 0.586        | 0.92<br>0.94     | 0.08<br>0.06 | 0.600        |
| Repeat 10 | c.10225C>G  | CGA>GGA  | p.R3409G   | New        | C/C/G        | 0.84<br>0.88       | 0.16<br>0.12 | 0.00<br>0.00 | 0.586        | 0.92<br>0.94     | 0.08<br>0.06 | 0.600        |
| Repeat 10 | c.10234G>A  | GGA>AGA  | p.G3412R   | New        | G/G/A        | 0.84<br>0.88       | 0.16<br>0.12 | 0.00<br>0.00 | 0.586        | 0.92<br>0.94     | 0.08<br>0.06 | 0.600        |
| Repeat 10 | c.10241A>G  | CAC>CGC  | p.H3414R   | New        | A/A/G        | 0.84<br>0.88       | 0.16<br>0.12 | 0.00<br>0.00 | 0.586        | 0.92<br>0.94     | 0.08<br>0.06 | 0.600        |
| Repeat 10 | c.10307G>C  | GGA>GCA  | p.G3436A   | rs2065955  | G/C/G        | 0.11<br>0.24       | 0.51<br>0.42 | 0.38<br>0.34 | 0.203        | 0.36<br>0.45     | 0.64<br>0.55 | 0.209        |
| Repeat 10 | c.10473T>C  | AAT>AAC  | p.=(3491N) | rs3126067  | T/C/C        | 0.11<br>0.24       | 0.51<br>0.42 | 0.38<br>0.34 | 0.203        | 0.36<br>0.45     | 0.64<br>0.55 | 0.209        |
| Repeat 10 | c.10491T>C  | GAT>GAC  | p.=(3497D) | rs3126066  | T/C/T        | 0.11<br>0.24       | 0.51<br>0.42 | 0.38<br>0.34 | 0.203        | 0.36<br>0.45     | 0.64<br>0.55 | 0.209        |
| Repeat 10 | c.10590G>T  | AGG>AGT  | p.R3530S   | rs72697000 | G/T/G        | 0.11<br>0.24       | 0.51<br>0.42 | 0.38<br>0.34 | 0.203        | 0.36<br>0.45     | 0.64<br>0.55 | 0.209        |
| Repeat 10 | c.10600A>T  | AAC>TAC  | p.N3534Y   | rs12732870 | A/A/T        | 0.84<br>0.88       | 0.16<br>0.12 | 0.00<br>0.00 | 0.586        | 0.92<br>0.94     | 0.08<br>0.06 | 0.600        |
| Repeat 10 | c.10691G>A  | CGT>CAT  | p.R3564H   | rs7518080  | G/A/G        | 0.11<br>0.24       | 0.51<br>0.42 | 0.38<br>0.34 | 0.203        | 0.36<br>0.45     | 0.64<br>0.55 | 0.209        |
| Repeat 10 | c.10702C>G  | CAG>GAG  | p.Q3568E   | rs7540123  | C/G/C        | 0.11<br>0.24       | 0.51<br>0.42 | 0.38<br>0.34 | 0.203        | 0.36<br>0.45     | 0.64<br>0.55 | 0.209        |
| Repeat 10 | c.10703A>G  | CAG>CGG  | p.Q3568R   | rs7532285  | A/G/A        | 0.11<br>0.24       | 0.51<br>0.42 | 0.38<br>0.34 | 0.203        | 0.36<br>0.45     | 0.64<br>0.55 | 0.209        |
| Repeat 10 | c.10734C>T  | CCC>CCT  | p.=(3578P) | New        | C/T/C        | 0.11<br>0.24       | 0.51<br>0.42 | 0.38<br>0.34 | 0.203        | 0.36<br>0.45     | 0.64<br>0.55 | 0.209        |
| Repeat 10 | c.10735A>G  | ACG >GCG | p.T3579A   | New        | A/G/A        | 0.11<br>0.24       | 0.51<br>0.42 | 0.38<br>0.34 | 0.203        | 0.36<br>0.45     | 0.64<br>0.55 | 0.209        |
| Repeat 10 | c.10736C>G  | ACG>AGG  | p.T3579R   | rs3126075  | C/G/C        | 0.11<br>0.24       | 0.51<br>0.42 | 0.38<br>0.34 | 0.203        | 0.36<br>0.45     | 0.64<br>0.55 | 0.209        |
| Repeat 10 | c.10746C>A  | CAC>CAA  | p.H3582Q   | New        | C/A/C        | 0.11<br>0.24       | 0.51<br>0.42 | 0.38<br>0.34 | 0.203        | 0.36<br>0.45     | 0.64<br>0.55 | 0.209        |
| Repeat 10 | c.10779G>C  | GAG>GAC  | p.E3593D   | rs12083389 | G/C/G        | 0.11<br>0.24       | 0.51<br>0.42 | 0.38<br>0.34 | 0.203        | 0.36<br>0.45     | 0.64<br>0.55 | 0.209        |
| Repeat 10 | c.10783T>C  | TCC>CCC  | p.S3595P   | New        | None         | 1.00<br>1.00       | 0.00<br>0.00 | 0.00<br>0.00 | 1.000        | 1.00<br>1.00     | 0.00<br>0.00 | 1.000        |
| Repeat 10 | c.10802A>G  | CAT>CGT  | p.H3601R   | New        | A/G/A        | 0.11<br>0.24       | 0.51<br>0.42 | 0.38<br>0.34 | 0.203        | 0.36<br>0.45     | 0.64<br>0.55 | 0.209        |

(Continued to the next page)

Supplementary Table 1. Continued

| Location    | Change HGCO | Code    | AA HUGO    | SNP (NCBI) | SNP* (A/B/C) | Genotype frequency |              |              |       | Allele frequency |              |       |
|-------------|-------------|---------|------------|------------|--------------|--------------------|--------------|--------------|-------|------------------|--------------|-------|
|             |             |         |            |            |              | AA                 | Aa           | aa           | P     | A                | a            | P     |
| Repeat 10   | c.10806T>C  | CAT>CAC | p.=(3602H) | New        | T/C/T        | 0.11<br>0.24       | 0.51<br>0.42 | 0.38<br>0.34 | 0.203 | 0.36<br>0.45     | 0.64<br>0.55 | 0.209 |
| Repeat 10   | c.10807G>A  | GCA>ACA | p.A3604T   | New        | G/A/G        | 0.11<br>0.24       | 0.51<br>0.42 | 0.38<br>0.34 | 0.203 | 0.36<br>0.45     | 0.64<br>0.55 | 0.209 |
| Repeat 10   | c.10813A>T  | AAT>TAT | p.N3605Y   | New        | A/T/A        | 0.11<br>0.24       | 0.51<br>0.42 | 0.38<br>0.34 | 0.203 | 0.36<br>0.45     | 0.64<br>0.55 | 0.209 |
| Repeat 10   | c.10814A>C  | AAT>ACT | p.N3605T   | New        | A/C/A        | 0.11<br>0.24       | 0.51<br>0.42 | 0.38<br>0.34 | 0.203 | 0.36<br>0.45     | 0.64<br>0.55 | 0.209 |
| Repeat 10   | c.10822G>C  | GGT>CGT | p.G3608R   | New        | G/C/G        | 0.11<br>0.24       | 0.51<br>0.42 | 0.38<br>0.34 | 0.203 | 0.36<br>0.45     | 0.64<br>0.55 | 0.209 |
| Repeat 10   | c.10836A>G  | GCA>GCG | p.=(3612A) | New        | A/G/A        | 0.11<br>0.24       | 0.51<br>0.42 | 0.38<br>0.34 | 0.203 | 0.36<br>0.45     | 0.64<br>0.55 | 0.209 |
| Repeat 10   | c.10872G>A  | GAG>GAA | p.=(3624E) | New        | G/A/G        | 0.11<br>0.24       | 0.51<br>0.42 | 0.38<br>0.34 | 0.203 | 0.36<br>0.45     | 0.64<br>0.55 | 0.209 |
| Repeat 10   | c.10918T>G  | TCA>GCA | p.S3639A   | New        | T/G/T        | 0.11<br>0.24       | 0.51<br>0.42 | 0.38<br>0.34 | 0.203 | 0.36<br>0.45     | 0.64<br>0.55 | 0.209 |
| Repeat 10   | c.10976C>A  | TCC>TAC | p.S3659Y   | New        | C/A/C        | 0.11<br>0.24       | 0.51<br>0.42 | 0.38<br>0.34 | 0.203 | 0.36<br>0.45     | 0.64<br>0.55 | 0.209 |
| Repeat 10   | c.10994G>C  | AGT>ACT | p.S3665T   | New        | G/C/G        | 0.11<br>0.24       | 0.51<br>0.42 | 0.38<br>0.34 | 0.203 | 0.36<br>0.45     | 0.64<br>0.55 | 0.209 |
| Repeat 10   | c.11043C>A  | GCC>GCA | p.=(3681A) | New        | C/A/C        | 0.11<br>0.24       | 0.51<br>0.42 | 0.38<br>0.34 | 0.203 | 0.36<br>0.45     | 0.64<br>0.55 | 0.209 |
| Repeat 10   | c.11046C>G  | CAC>CAG | p.H3682Q   | New        | C/G/C        | 0.11<br>0.24       | 0.51<br>0.42 | 0.38<br>0.34 | 0.203 | 0.36<br>0.45     | 0.64<br>0.55 | 0.209 |
| Repeat 10   | c.11050C>A  | CAG>AAG | p.Q3684 K  | New        | C/A/C        | 0.11<br>0.24       | 0.51<br>0.42 | 0.38<br>0.34 | 0.203 | 0.36<br>0.45     | 0.64<br>0.55 | 0.209 |
| Repeat 10   | c.11052G>A  | CAG>CAA | p.=(3684Q) | New        | G/A/G        | 0.11<br>0.24       | 0.51<br>0.42 | 0.38<br>0.34 | 0.203 | 0.36<br>0.45     | 0.64<br>0.55 | 0.209 |
| Repeat 10   | c.11077C>A  | CAA>AAA | p.Q3693K   | New        | C/A/C        | 0.11<br>0.24       | 0.51<br>0.42 | 0.38<br>0.34 | 0.203 | 0.36<br>0.45     | 0.64<br>0.55 | 0.209 |
| Repeat 10   | c.11086A>G  | ACA>GCA | p.T3696 A  | New        | A/G/A        | 0.11<br>0.24       | 0.51<br>0.42 | 0.38<br>0.34 | 0.203 | 0.36<br>0.45     | 0.64<br>0.55 | 0.209 |
| Repeat 10   | c.11096G>A  | CGG>CAG | p.R3699Q   | New        | G/A/G        | 0.11<br>0.24       | 0.51<br>0.42 | 0.38<br>0.34 | 0.203 | 0.36<br>0.45     | 0.64<br>0.55 | 0.209 |
| Repeat 10   | c.11102C>G  | GCA>GGA | p.A3701G   | New        | C/G/C        | 0.11<br>0.24       | 0.51<br>0.42 | 0.38<br>0.34 | 0.203 | 0.36<br>0.45     | 0.64<br>0.55 | 0.209 |
| Repeat 10   | c.11103A>G  | GCA>GCG | p.=(3701A) | New        | A/G/A        | 0.11<br>0.24       | 0.51<br>0.42 | 0.38<br>0.34 | 0.203 | 0.36<br>0.45     | 0.64<br>0.55 | 0.209 |
| Repeat 10   | c.11105G>A  | GGA>GAA | p.G3702E   | New        | G/A/G        | 0.11<br>0.24       | 0.51<br>0.42 | 0.38<br>0.34 | 0.203 | 0.36<br>0.45     | 0.64<br>0.55 | 0.209 |
| Repeat 10.2 | 10B007A>G   | AGA>GGA | p.R→G      | New        | None         | 0.00<br>0.00       | 0.00<br>0.00 | 1.00<br>1.00 | 1.000 | 0.00<br>0.00     | 1.00<br>1.00 | 1.000 |
| Repeat 10.2 | 10B310C>T   | CCC>TCC | p.P→S      | New        | None         | 0.00<br>0.00       | 0.00<br>0.00 | 1.00<br>1.00 | 1.000 | 0.00<br>0.00     | 1.00<br>1.00 | 1.000 |
| Repeat 10.2 | 10B697C>G   | CCT>GCT | p.P→A      | New        | None         | 0.00<br>0.00       | 0.00<br>0.00 | 1.00<br>1.00 | 1.000 | 0.00<br>0.00     | 1.00<br>1.00 | 1.000 |
| Repeat 10   | c.11213G>A  | CGC>CAC | p.R3738H   | New        | G/A/G        | 0.11<br>0.24       | 0.51<br>0.42 | 0.38<br>0.34 | 0.203 | 0.36<br>0.45     | 0.64<br>0.55 | 0.209 |
| Repeat 11   | c.11909C>T  | TCA>TTA | p.S3970L   | New        | None         | 0.80<br>0.88       | 0.20<br>0.12 | 0.00<br>0.00 | 0.300 | 0.90<br>0.94     | 0.10<br>0.06 | 0.322 |
| Repeat 11   | c.12018T>C  | GTT>GTC | p.=(4006V) | New        | None         | 0.96<br>0.98       | 0.04<br>0.02 | 0.00<br>0.00 | 1.000 | 0.98<br>0.99     | 0.02<br>0.01 | 1.000 |
| Repeat 11   | c.12090G>T  | ACG>ACT | p.=(4030T) | New        | None         | 0.89<br>0.98       | 0.11<br>0.02 | 0.00<br>0.00 | 0.115 | 0.95<br>0.99     | 0.05<br>0.01 | 0.122 |

\*SNP (A/B/C) represents SNP according to the repeat number polymorphism, for example, for the c.995 locus SNP (A/B/C) is G/T/T. That means repeat number polymorphic variant A, B, C has G, T, T for its base at the 995th position, respectively. Usually A' follows the SNP pattern of A, B's follows the SNP pattern of B. However, if there is discrepancy between A and A' (or B and B's), it is explicitly commented (See for example c.7956A>C. At that locus, A has cytosine, meanwhile A' has adenine for the corresponding base. All numerics denote genotype (or allele) frequency: upper row for control group, lower row for atopic group. The exception is the column under heading 'p', which denotes P value of  $\chi^2$  test.
